# Supplementary material
Source: publisher site journal article supplement (https://www.dovepress.com/article/421148)
Supplement: Supplementary file 1 [file get_supplementary_file.php]

**Supplementary material 1.** Inclusion and exclusion criteria

**Inclusion criteria**

1. Average numeric rating scale (NRS) score of radiating leg pain for three recent consecutive days ≥5.
2. Radiologically diagnosed with lumbar disc herniation on lumbar spine magnetic resonance imaging (L-spine MRI), which can account for radiating leg pain.
3. Those aged between 19 and 70 years.
4. Those who signed the informed consent form (ICF).

**Exclusion criteria**

1. Those who were diagnosed with specific critical conditions that may cause low back pain or radiating leg pain, such as spine metastasis of malignancy, acute fracture of the spine, or spine dislocation.
2. Progressive neurologic deficits or severe neurological symptoms.
3. Soft tissue diseases that may induce low back pain, including cancer, fibromyalgia, rheumatoid arthritis, and gout.
4. Presence of chronic underlying disease that may interfere with the efficacy of the intervention or interpretation of the outcome, such as stroke, myocardial infarction, kidney disease, dementia, diabetic neuropathy, and epilepsy.
5. Those who were taking steroids, immunosuppressants, psychotropic medications, or any other medication that may affect the results of this study.
6. Those who were deemed not appropriate or safe to receive acupuncture or nerve block treatment, such as those with hemorrhagic diseases, severe diabetes with a risk of infection, or those taking an anticoagulant drug.
7. Those who were taking medications that may affect the pain outcome, such as non-steroidal anti-inflammatory drugs, or had acupuncture treatment within the last 5 days at the time of the study.
8. Pregnant or lactating women or those who were planning pregnancy.
9. Those who had undergone lumbar spinal surgery within the last 3 months.
10. Those who had participated in other clinical trials within 1 month or were planning to participate in other trials within 6 months from the date of selection or during the follow-up period of this trial.
11. Those who were unable to sign the informed consent form.
12. Those who were deemed not suitable to participate in the trial according to an investigator's decision.

**Supplementary material 2.** Outcomes

1. Primary outcomes

The primary outcome of this study was the numeric rating scale (NRS) score of radiating leg pain. The NRS is a numeric pain scale for objective representation of subjective pain felt by individual patients, and the intensity of pain over the past week was evaluated. The patient selects a number from 0 to 10 that best represents the current level of pain and discomfort (0 representing no pain and 10 representing the worst pain and discomfort imaginable) [1]. NRS is valid, reliable and appropriate for use in clinical practice [2].

1. Secondary outcomes

2.1. Low back pain numeric rating scale

The intensity of low back pain (LBP) over the past week was assessed using NRS. NRS was measured weekly at baseline and during the intervention period; a total of 11 measurements were performed, including three times during the follow-up period.

2.2. Oswestry Disability Index

The primary outcome in this study was the change in the Oswestry Disability Index (ODI) score at week 9, the primary endpoint, from baseline. The ODI is a 10-item questionnaire developed for quantified assessment of functional impairment for LBP. Each item is divided into 6 levels and assigned 0–5 points, respectively. The higher the score, the more severe the disability. The Korean ODI questionnaire was used [3]. The Korean version of ODI is a reliable and valid instrument to measure disablility of patients with bak pain [3, 4]. ODI was measured five times in total; at baseline, Week 5, and three times (Weeks 9, 14, and 27) during the follow-up period.

2.3. Visual analog scale for low back pain and radiating leg pain

The visual analog scale (VAS) is a rating scale that requires patients to mark the intensity of pain that they feel on a 100 mm horizontal line, indicating no pain at one end and the most severe pain imaginable at the other end. The patient enters the LBP and radiating leg pain experienced during the past week as a point on the line. NRS is valid, reliable and appropriate for use in clinical practice [2]. VAS was measured weekly at baseline and during the intervention period, and a total of 11 measurements were performed, including three times during the follow-up period.

2.4. Fear-Avoidance Beliefs Questionnaire

The Fear-Avoidance Beliefs Questionnaire (FABQ) is a self-report questionnaire for the assessment of fear avoidance responses for physical activities and work in patients with LBP and comprises 16 items. In this study, a version questionnaire that was translated into Korean and verified for its reliability and validity was used [5]. Cha Y.J et al[5] said the Korean version of the FABQ is useful method for measuring the fear of daily activities of patients with low back pain. This questionnaire consisted of five items to evaluate fear-avoidance beliefs for physical activity (FABQ-PA) and 11 items to evaluate fear-avoidance beliefs for work (FABQ-W). Of a total of 16 items, 5 items (Nos. 2, 8, 13, 14, and 16) were not used when adding up the scores after the survey. A 7-point scale was used, from 0 points for “strongly disagree” to 6 points for “strongly agree,” with a minimum of 0 points and a maximum of 66 points for total scores. Higher scores indicate a stronger fear avoidance behavior.

2.5. Patient Global Impression of Change

Patient Global Impression of Change (PGIC) allows patients to subjectively evaluate the degree of improvement in seven levels. Patients present their degree of improvement in functional impairment after treatment using a 7-point Likert scale (1, very much improved; 2, much improved; 3, minimally improved; 4, no change; 5, minimally worse; 6, much worse; or 7, very much worse). PGIC score was significantly correlated with pain intensity, pain interference in daily life, and treatment effect [6, 7]. PGIC was measured three times (Weeks 9, 14, and 27) in total during the follow-up period.

2.6. Short Form-12 Health Survey version 2

The Short Form-12 Health Survey, version 2 (SF-12 v2) is a questionnaire developed for the evaluation of the health-related quality of life (HRQoL) and comprises 12 items for 8 domains: physical functioning, role-physical, bodily pain, general health, vitality, social functioning, role-emotional, and mental health. A higher score indicates a better HRQoL. In this study, the Korean version of SF-12, which has been verified for its reliability and validity, was used [8]. SF-12 was measured five times in total: at baseline, Week 5, and three times (Weeks 9, 14, and 27) during the follow-up period.

2.7. EuroQol-5 Dimension

In the 5-Level EuroQol-5 Dimension (EQ-5D-5L), patients are asked to indicate their health state in multiple dimensions, and a pre-assigned preference score for each functional level is used for indirect calculation of the quality weight of a specific health state. This instrument is widely used to measure the quality of life. EQ-5D-5L consists of questions in five dimensions: mobility, self-care, usual activities, pain, and anxiety/depression. Each question is answered on a 5-point Likert scale. The total score is on a scale of 0-1, with higher scores indicating a better quality of life [9]. In this study, the Korean version of EQ5D-5L, which has been validated in a previous study [9, 10], was used. EQ-5D-5L was measured five times in total: at baseline, Week 5, and three times (Weeks 9, 14, and 27) during the follow-up period.

2.8. Credibility and Expectancy

For the evaluation of the treatment expectancy of study participants, a 9-point Likert scale was used. At the screening visit, the recruited patients were asked, “How much do you think the KM non-pharmacological treatment and the WM pharmacological treatment will improve your symptoms?” and the question was answered by scoring as 1 = not at all and 9 = very much.

1. Timeline

The timeline of this clinical study is outlined in Supplementary Table 1.

Supplementary Table 1. Timelines of the clinical study

| Time point | Screening | Enrollment, Allocation | Active treat post-allocation | | | Follow-up | |
| --- | --- | --- | --- | --- | --- | --- | --- |
| Week  -1 to -2 | Week  0 | Week  1 | Week  2 | Weeks  3, 4, 5,  6, 7, 8 | Week  9 | Weeks  14, 27 |
| Visit window | **-10** | **Control point** | **±3** | **±3** | **±3** | **±7** | **±14** |
| **Enrollment** | | | | | | | |
| Eligibility screening | **○** | **○** |  |  |  |  |  |
| Written informed consent | **○** |  |  |  |  |  |  |
| Vital signs | **○** | **○** | ← every visit → | | | **○** | **○** |
| Sociodemographic characteristics and medical history | **○** |  |  |  |  |  |  |
| L-spine MRI | **○** |  |  |  |  |  | **○** |
| L-spine X-ray (AP&LAT) | **○** |  |  |  |  |  | **○** |
| Randomized allocation |  | **○** |  |  |  |  |  |
| Blood analysis | **○** |  |  |  |  |  |  |
| **Interventions** | | | | | | | |
| Treatment in the non-pharmacological group  (Experimental group) |  |  | ← 2 times /week → | | |  |  |
| Treatment in the pharmacological group (Control group) |  |  | ← 2 times /week → | | |  |  |
| **Assessments** | | | | | | | |
| Symptoms and change |  |  | ← every visit → | | | **○** | **○** |
| Drug Consumption | **○** | **○** | ← every visit → | | | **○** | **○** |
| Adverse events |  | **○** | ← every visit → | | | **○** | **○** |
| NRS of LBP |  |  | **○** | **○** | **○** | **○** | **○** |
| NRS of leg pain | **○** |  | **○** | **○** | **○** | **○** | **○** |
| VAS of LBP |  |  | **○** | **○** | **○** | **○** | **○** |
| VAS of leg pain |  |  | **○** | **○** | **○** | **○** | **○** |
| Oswestry Disability Index (ODI) |  |  | **○** |  | **○(week5)** | **○** | **○** |
| Fear-Avoidance Beliefs Questionnaire (FABQ) |  |  | **○** |  |  | **○** | **○** |
| PGIC |  |  |  |  |  | **○** | **○** |
| SF-12 |  |  | **○** |  | **○(week 5)** | **○** | **○** |
| EQ-5D-5L |  |  | **○** |  | **○(week 5)** | **○** | **○** |
| Physical • Sensorineural examination | **○** |  | **○** |  | **○(week 5)** | **○** | **○** |
| Credibility and Expectancy |  | **○** |  |  |  |  |  |
| Economic evaluation question  - medical cost |  |  | **○** | **○** | **○** | **○** | **○** |
| Economic evaluation question  - time cost |  |  |  | **○** |  |  |  |
| Economic evaluation question  - productivity loss |  |  | **○** | **○** | **○** | **○** | **○** |
| Assessment of treatment adherence |  |  |  |  |  | **○** |  |

* The schedule for Weeks -1 to -2, 0, and 1-1 may proceed on the same day.

* For blood analysis results, those collected within the last 2 weeks can be used; for the results of Lumbar-Spine MRI and Lumbar-Spine radiographs, those obtained after the onset of the condition and within the last 3 months can be used (including the results from this hospital or other hospitals)

* The follow-up schedule at Weeks 14 and 27 may proceed in the form of telephone surveys or online surveys if a direct visit to the hospital is not possible.

**Supplementary Table 2.** Treatment details for patients in the two groups during the intervention period

|  | **n** | **Frequency per patient** |
| --- | --- | --- |
| **<Non-pharmacological treatment group>** | | |
| **1. Acupuncture** |  |  |
| **Total** | 15 | 14.7 ± 3.9 |
| **Acupoints** |  |  |
| BL23 | 15 (100) | 14.7 ± 3.9 |
| BL57 | 13 (86.7) | 14.5 ± 4.2 |
| BL52 | 13 (86.7) | 14.5 ± 4.2 |
| BL60 | 10 (66.7) | 14.4 ± 3.8 |
| KI3 | 8 (53.3) | 14 ± 4.2 |
| GB30 | 8 (53.3) | 15.4 ± 1.4 |
| BL40 | 7 (46.7) | 14.9 ± 1.7 |
| BL24 | 6 (40) | 14 ± 4.9 |
| BL56 | 4 (26.7) | 15.8 ± 0.5 |
| CV6 | 3 (20) | 16 ± 0 |
| GV4 | 3 (20) | 11 ± 8.7 |
| BL25 | 2 (13.3) | 16 ± 0 |
| BL60 | 1 (6.7) | 1 ± NA |
| GB39 | 1 (6.7) | 16 ± NA |
| ST38 | 1 (6.7) | 16 ± NA |
| ST36 | 1 (6.7) | 16 ± NA |
| BL54 | 1 (6.7) | 16 ± NA |
| **2. Electroacupuncture** | 15 (100) | 14.6 ± 3.9 |
| **3. Spinal manual therapy** |  |  |
| **Total** | 15 (100) | 14.7 ± 3.9 |
| **Specific area** |  |  |
| Pelvic region-composite techniques | 13 (86.7) | 14.4 ± 4.1 |
| Lateral position lumbar distraction technique | 5 (33.3) | 1.4 ± 0.5 |
| Pelvic region-single technique | 2 (13.3) | 13.5 ± 0.7 |
| **<Pharmacological treatment>** | | |
| **1. Physical therapy** |  |  |
| **Total** | 15 | 14.4 ± 1.5 |
| **Specific area** |  |  |
| ICT | 15 (100) | 14.2 ± 1.7 |
| Ultrasound | 15 (100) | 14.2 ± 1.7 |
| Traction | 13 (86.7) | 13.2 ± 3.9 |
| Laser therapy | 3 (20) | 12.3 ± 3.8 |
| **2. Pharmacotherapy (prescription day)** |  |  |
| **Total** | 15 (100) | 53.9 ± 12.4 |
| Aceclofenac | 15 (100) | 46.2 ± 17.7 |
| Celecoxib | 1 (6.7) | 42 ± NA |
| Naproxen | 1 (6.7) | 28 ± NA |
| Tramadol and paracetamol | 15 (100) | 46.2 ± 17.7 |
| Pregabalin | 15 (100) | 46.2 ± 17.7 |
| Eperisone | 1 (6.7) | 28 ± NA |
| Almagate | 15 (100) | 48.1 ± 14.5 |
| **3. Nerve block** | 11 (73.3) | 1.4 ± 0.7 |

**Abbreviations:** BL, bladder; CV, conception vessel; GB, gall bladder; GV, governor vessel; ICT, interferential current therapy; ST, stomach; KI, kidney;

**Supplementary Table 3.** Primary and secondary outcomes according to treatment at all time points

|  | **Non-Phm** | **Phm** | **Difference** | **P-value** |
| --- | --- | --- | --- | --- |
| NRS of leg pain |  |  |  |  |
| week 1-2 | 6.51 (5.75 to 7.26) | 6.39 (5.67 to 7.12) | -0.11 (-1.16 to 0.94) | 0.835 |
| week 2-1 | 6.08 (5.32 to 6.83) | 5.53 (4.80 to 6.26) | -0.55 (-1.60 to 0.50) | 0.302 |
| week 2-2 | 5.93 (5.18 to 6.69) | 5.24 (4.50 to 5.99) | -0.69 (-1.75 to 0.37) | 0.201 |
| week 3-1 | 5.86 (5.11 to 6.62) | 5.46 (4.73 to 6.19) | -0.40 (-1.45 to 0.65) | 0.45 |
| week 3-2 | 5.22 (4.47 to 5.97) | 4.75 (4.01 to 5.49) | -0.47 (-1.53 to 0.59) | 0.383 |
| week 4-1 | 4.93 (4.18 to 5.69) | 4.59 (3.87 to 5.32) | -0.34 (-1.39 to 0.71) | 0.523 |
| week 4-2 | 4.93 (4.18 to 5.69) | 4.86 (4.13 to 5.59) | -0.07 (-1.12 to 0.97) | 0.891 |
| week 5-1 | 4.93 (4.18 to 5.69) | 4.33 (3.60 to 5.06) | -0.61 (-1.65 to 0.44) | 0.255 |
| week 5-2 | 4.36 (3.61 to 5.12) | 3.63 (2.88 to 4.37) | -0.73 (-1.79 to 0.33) | 0.173 |
| week 6-1 | 4.08 (3.32 to 4.83) | 3.69 (2.93 to 4.46) | -0.38 (-1.45 to 0.69) | 0.482 |
| week 6-2 | 3.86 (3.11 to 4.62) | 3.46 (2.71 to 4.20) | -0.40 (-1.46 to 0.66) | 0.452 |
| week 7-1 | 3.58 (2.82 to 4.33) | 3.56 (2.80 to 4.32) | -0.02 (-1.09 to 1.06) | 0.978 |
| week 7-2 | 3.13 (2.36 to 3.90) | 3.24 (2.45 to 4.02) | 0.10 (-1.00 to 1.20) | 0.852 |
| week 8-1 | 3.22 (2.43 to 4.01) | 3.32 (2.57 to 4.06) | 0.09 (-0.99 to 1.18) | 0.864 |
| week 8-2 | 2.59 (1.82 to 3.37) | 2.73 (2.00 to 3.46) | 0.13 (-0.93 to 1.19) | 0.804 |
| **week 9** | 2.83 (2.05 to 3.60) | 2.73 (2.00 to 3.46) | -0.10 (-1.16 to 0.96) | 0.856 |
| week 14 | 2.75 (1.98 to 3.52) | 4.39 (3.67 to 5.12) | 1.65 ( 0.59 to 2.71)** | 0.003 |
| week 27 | 3.29 (2.52 to 4.06) | 2.73 (2.00 to 3.46) | -0.56 (-1.62 to 0.50) | 0.299 |
| NRS of LBP |  |  |  |  |
| week 1-2 | 6.07 (5.24 to 6.90) | 5.97 (5.17 to 6.78) | -0.10 (-1.26 to 1.07) | 0.871 |
| week 2-1 | 5.93 (5.09 to 6.76) | 5.71 (4.90 to 6.51) | -0.22 (-1.39 to 0.95) | 0.709 |
| week 2-2 | 5.64 (4.81 to 6.48) | 5.26 (4.44 to 6.08) | -0.38 (-1.56 to 0.80) | 0.523 |
| week 3-1 | 5.93 (5.09 to 6.76) | 5.37 (4.57 to 6.18) | -0.55 (-1.72 to 0.61) | 0.349 |
| week 3-2 | 5.29 (4.45 to 6.12) | 4.84 (4.02 to 5.67) | -0.44 (-1.62 to 0.74) | 0.461 |
| week 4-1 | 4.93 (4.09 to 5.76) | 4.64 (3.84 to 5.45) | -0.29 (-1.45 to 0.88) | 0.627 |
| week 4-2 | 4.86 (4.02 to 5.69) | 4.84 (4.04 to 5.65) | -0.02 (-1.18 to 1.15) | 0.979 |
| week 5-1 | 4.64 (3.81 to 5.48) | 4.24 (3.44 to 5.05) | -0.40 (-1.57 to 0.77) | 0.497 |
| week 5-2 | 4.50 (3.67 to 5.33) | 3.32 (2.50 to 4.14) | -1.18 (-2.35 to 0.00) | 0.05 |
| week 6-1 | 4.29 (3.45 to 5.12) | 3.60 (2.77 to 4.44) | -0.68 (-1.87 to 0.51) | 0.26 |
| week 6-2 | 4.43 (3.59 to 5.26) | 3.21 (2.39 to 4.03) | -1.22 (-2.40 to -0.04)* | 0.043 |
| week 7-1 | 4.21 (3.38 to 5.05) | 2.99 (2.15 to 3.83) | -1.23 (-2.42 to -0.04)* | 0.043 |
| week 7-2 | 3.94 (3.09 to 4.79) | 2.98 (2.12 to 3.84) | -0.96 (-2.18 to 0.26) | 0.123 |
| week 8-1 | 3.64 (2.77 to 4.52) | 3.06 (2.24 to 3.89) | -0.58 (-1.79 to 0.63) | 0.344 |
| week 8-2 | 3.17 (2.32 to 4.02) | 2.51 (1.70 to 3.31) | -0.66 (-1.84 to 0.52) | 0.269 |
| **week 9** | 3.25 (2.39 to 4.10) | 2.91 (2.10 to 3.71) | -0.34 (-1.52 to 0.84) | 0.571 |
| week 14 | 3.55 (2.70 to 4.41) | 4.31 (3.50 to 5.11) | 0.75 (-0.43 to 1.93) | 0.208 |
| week 27 | 3.71 (2.86 to 4.56) | 2.91 (2.10 to 3.71) | -0.80 (-1.98 to 0.38) | 0.182 |
| VAS of leg pain |  |  |  |  |
| week 2-1 | 59.04 (50.30 to 67.79) | 55.36 (46.91 to 63.80) | -3.69 (-15.85 to 8.48) | 0.549 |
| week 3-1 | 55.33 (46.58 to 64.08) | 51.82 (43.38 to 60.26) | -3.51 (-15.67 to 8.66) | 0.569 |
| week 4-1 | 47.04 (38.30 to 55.79) | 44.49 (36.05 to 52.93) | -2.56 (-14.72 to 9.61) | 0.678 |
| week 5-1 | 47.69 (38.94 to 56.43) | 42.36 (33.91 to 50.80) | -5.33 (-17.50 to 6.83) | 0.387 |
| week 6-1 | 39.04 (30.30 to 47.79) | 35.02 (26.17 to 43.87) | -4.03 (-16.48 to 8.43) | 0.523 |
| week 7-1 | 33.97 (25.23 to 42.72) | 32.70 (23.86 to 41.55) | -1.27 (-13.71 to 11.18) | 0.84 |
| week 8-1 | 29.88 (20.68 to 39.08) | 30.55 (21.91 to 39.18) | 0.67 (-11.95 to 13.29) | 0.917 |
| **week 9** | 25.52 (16.56 to 34.48) | 25.42 (16.98 to 33.86) | -0.09 (-12.41 to 12.22) | 0.988 |
| week 14 | 22.69 (12.51 to 32.87) | 42.38 (33.53 to 51.22) | 19.69 (6.20 to 33.18)** | 0.005 |
| week 27 | 34.66 (24.86 to 44.46) | 29.45 (20.61 to 38.30) | -5.21 (-18.41 to 8.00) | 0.437 |
| VAS of LBP |  |  |  |  |
| week 2-1 | 60.16 (50.92 to 69.39) | 56.31 (47.41 to 65.20) | -3.85 (-16.88 to 9.18) | 0.559 |
| week 3-1 | 59.52 (50.28 to 68.75) | 51.18 (42.28 to 60.07) | -8.34 (-21.37 to 4.69) | 0.207 |
| week 4-1 | 50.30 (41.07 to 59.53) | 45.04 (36.15 to 53.94) | -5.26 (-18.29 to 7.78) | 0.425 |
| week 5-1 | 46.16 (36.92 to 55.39) | 40.84 (31.95 to 49.74) | -5.32 (-18.35 to 7.72) | 0.42 |
| week 6-1 | 41.66 (32.42 to 50.89) | 34.63 (25.31 to 43.94) | -7.03 (-20.36 to 6.29) | 0.298 |
| week 7-1 | 40.09 (30.85 to 49.32) | 29.69 (20.38 to 39.01) | -10.39 (-23.71 to 2.93) | 0.125 |
| week 8-1 | 36.42 (26.71 to 46.12) | 28.69 (19.59 to 37.78) | -7.73 (-21.24 to 5.77) | 0.259 |
| **week 9** | 32.55 (23.11 to 42.00) | 27.71 (18.81 to 36.60) | -4.85 (-18.03 to 8.33) | 0.467 |
| week 14 | 32.07 (21.35 to 42.79) | 41.99 (32.68 to 51.31) | 9.92 ( -4.46 to 24.31) | 0.175 |
| week 27 | 37.34 (27.01 to 47.68) | 27.46 (18.14 to 36.77) | -9.89 (-23.99 to 4.22) | 0.168 |
| ODI |  |  |  |  |
| week 5-1 | 32.17 (27.00 to 37.34) | 33.27 (28.28 to 38.26) | 1.10 (-6.09 to 8.29) | 0.761 |
| **week 9** | 25.54 (20.20 to 30.87) | 29.74 (24.75 to 34.73) | 4.20 (-3.11 to 11.51) | 0.255 |
| week 14 | 23.33 (18.00 to 28.67) | 32.01 (27.02 to 37.00) | 8.67 ( 1.37 to 15.98)* | 0.021 |
| week 27 | 23.03 (17.69 to 28.36) | 27.19 (22.20 to 32.18) | 4.17 (-3.14 to 11.48) | 0.259 |
| FABQ_physical activity |  |  |  |  |
| **week 9** | 15.79 (13.41 to 18.17) | 16.72 (14.50 to 18.93) | 0.93 (-2.33 to 4.18) | 0.572 |
| week 14 | 14.33 (11.95 to 16.71) | 16.52 (14.30 to 18.73) | 2.19 (-1.07 to 5.44) | 0.184 |
| week 27 | 13.79 (11.41 to 16.17) | 15.12 (12.90 to 17.33) | 1.33 (-1.93 to 4.58) | 0.419 |
| FABQ_work |  |  |  |  |
| **week 9** | 21.92 (17.62 to 26.22) | 22.23 (18.23 to 26.23) | 0.31 (-5.57 to 6.18) | 0.917 |
| week 14 | 21.15 (16.85 to 25.45) | 19.96 (15.96 to 23.96) | -1.19 (-7.06 to 4.68) | 0.686 |
| week 27 | 17.15 (12.85 to 21.45) | 18.69 (14.69 to 22.70) | 1.54 (-4.33 to 7.41) | 0.6 |
| EQ5D_score |  |  |  |  |
| week 5-1 | 0.75 (0.71 to 0.80) | 0.74 (0.70 to 0.78) | -0.01 (-0.07 to 0.05) | 0.759 |
| **week 9** | 0.74 (0.70 to 0.79) | 0.73 (0.69 to 0.77) | -0.01 (-0.07 to 0.05) | 0.738 |
| week 14 | 0.77 (0.72 to 0.81) | 0.73 (0.69 to 0.77) | -0.03 (-0.09 to 0.03) | 0.285 |
| week 27 | 0.76 (0.71 to 0.80) | 0.74 (0.70 to 0.78) | -0.02 (-0.08 to 0.04) | 0.532 |
| PCS |  |  |  |  |
| week 5-1 | 39.24 (36.48 to 42.01) | 38.96 (36.28 to 41.64) | -0.28 (-4.14 to 3.58) | 0.884 |
| **week 9** | 41.45 (38.59 to 44.31) | 40.85 (38.18 to 43.53) | -0.60 (-4.53 to 3.34) | 0.763 |
| week 14 | 42.07 (39.21 to 44.93) | 39.25 (36.57 to 41.92) | -2.83 (-6.76 to 1.11) | 0.156 |
| week 27 | 42.95 (40.09 to 45.81) | 40.79 (38.11 to 43.46) | -2.17 (-6.10 to 1.77) | 0.276 |
| MCS |  |  |  |  |
| week 5-1 | 50.39 (46.14 to 54.64) | 48.59 (44.49 to 52.70) | -1.80 (-7.71 to 4.12) | 0.545 |
| **week 9** | 52.51 (48.14 to 56.89) | 48.56 (44.45 to 52.66) | -3.96 (-9.96 to 2.05) | 0.193 |
| week 14 | 49.59 (45.21 to 53.96) | 47.25 (43.15 to 51.36) | -2.34 (-8.34 to 3.67) | 0.44 |
| week 27 | 51.55 (47.17 to 55.92) | 49.73 (45.63 to 53.84) | -1.82 (-7.82 to 4.19) | 0.548 |
| SF-6D |  |  |  |  |
| week 5-1 | 0.68 (0.63 to 0.72) | 0.65 (0.61 to 0.70) | -0.02 (-0.09 to 0.04) | 0.507 |
| **week 9** | 0.70 (0.65 to 0.75) | 0.66 (0.62 to 0.71) | -0.03 (-0.10 to 0.03) | 0.319 |
| week 14 | 0.68 (0.63 to 0.73) | 0.64 (0.59 to 0.69) | -0.04 (-0.10 to 0.03) | 0.306 |
| week 27 | 0.73 (0.68 to 0.78) | 0.69 (0.64 to 0.74) | -0.04 (-0.11 to 0.03) | 0.275 |
| WPAI_General Health |  |  |  |  |
| week 2-1 | 54.01 (44.66 to 63.36) | 53.50 (44.47 to 62.54) | -0.51 (-13.51 to 12.50) | 0.939 |
| week 3-1 | 51.15 (41.80 to 60.51) | 46.17 (37.14 to 55.20) | -4.98 (-17.98 to 8.02) | 0.448 |
| week 4-1 | 51.15 (41.80 to 60.51) | 43.50 (34.47 to 52.54) | -7.65 (-20.65 to 5.35) | 0.246 |
| week 5-1 | 48.30 (38.94 to 57.65) | 40.84 (31.81 to 49.87) | -7.46 (-20.46 to 5.54) | 0.257 |
| week 6-1 | 45.44 (36.08 to 54.79) | 35.66 (26.25 to 45.08) | -9.78 (-23.05 to 3.50) | 0.147 |
| week 7-1 | 39.72 (30.37 to 49.08) | 35.30 (25.88 to 44.72) | -4.42 (-17.69 to 8.85) | 0.51 |
| week 8-1 | 37.80 (28.01 to 47.58) | 31.76 (22.55 to 40.98) | -6.03 (-19.48 to 7.41) | 0.375 |
| **week 9** | 40.23 (30.67 to 49.79) | 36.84 (27.81 to 45.87) | -3.39 (-16.55 to 9.76) | 0.609 |
| week 14 | 35.62 (26.06 to 45.18) | 43.50 (34.47 to 52.54) | 7.89 ( -5.26 to 21.04) | 0.237 |
| week 27 | 36.39 (26.83 to 45.95) | 32.84 (23.81 to 41.87) | -3.55 (-16.70 to 9.60) | 0.593 |
| PGIC |  |  |  |  |
| **week 9** | 2.31 (1.75 to 2.86) | 2.53 (2.01 to 3.05) | -0.23 (-0.99 to 0.54) | 0.555 |
| week 14 | 2.38 (1.83 to 2.94) | 3.00 (2.48 to 3.52) | -0.62 (-1.38 to 0.15) | 0.111 |
| week 27 | 2.38 (1.83 to 2.94) | 2.40 (1.88 to 2.92) | -0.02 (-0.78 to 0.75) | 0.968 |

**Abbreviations:** EQ5D, European Quality of Life-5 Dimensions; FABQ, Fear-Avoidance Beliefs Questionnaire; LBP, Low Back Pain; MCS, Mental Component Summary; Non-Phm, Non-pharmacological treatment; NRS, Numeric Rating Scale; ODI, Oswestry Disability Index; PCS, Physical Component Summary; PGIC, Patient Global Impression of Change; phm, pharmacological treatment; SF-6D, Short Form-6 Dimensions; VAS, Visual Analogue Scale; WPAI, Work Productivity and Activity Impairment

* *p*-value<0.05, ** *p*-value<0.01

**Supplementary Table 4.** Effect size of primary and secondary outcomes

| **Outcomes** | **Week** | **effect size** |
| --- | --- | --- |
| NRS of leg pain | Week9 | 0.03 |
|  | Week13 | 0.85 |
| NRS of LBP | Week9 | 0.05 |
|  | Week13 | 0.56 |
| ODI | Week9 | 0.35 |
|  | Week13 | 0.88 |
| VAS for leg pain | Week9 | 0.10 |
|  | Week13 | 0.90 |
| VAS for back pain | Week9 | 0.04 |
|  | Week13 | 0.60 |
| FABQ_physical activity | Week9 | 0.33 |
|  | Week13 | 0.51 |
| FABQ_work | Week9 | 0.05 |
|  | Week13 | 0.09 |
| EQ-5D_score | Week9 | 0.08 |
|  | Week13 | 0.63 |
| PCS | Week9 | 0.24 |
|  | Week13 | 0.76 |
| MCS | Week9 | 0.40 |
|  | Week13 | 0.22 |

**Abbreviations:** EQ5D, European Quality of Life-5 Dimensions; FABQ, Fear-Avoidance Beliefs Questionnaire; LBP, Low Back Pain; MCS, Mental Component Summary; NRS, Numeric Rating Scale; ODI, Oswestry Disability Index; PCS, Physical Component Summary; VAS, Visual Analogue Scale;

**Supplementary Table 5.** Magnetic resonance imaging changes

|  | Baseline | | | Week 26 | | |
| --- | --- | --- | --- | --- | --- | --- |
| **Group** | **Non-Phm** | **Phm** | **P-value** | **Non-Phm** | **Phm** | **P-value** |
| Desiccated + Bulging |  |  |  |  |  |  |
| Yes | 9 (90.0) | 12 (100.0) | 0.4546 | 9 (90.0) | 12 (100.0) | 0.45406 |
| No | 1 (10.0) | 0 (0.0) | 1 (10.0) | 0 (0.0) |
| Protrusion |  |  |  |  |  |  |
| Yes | 10 (100.0) | 11 (91.7) | 1 | 9 (90.0) | 11 (91.7) | 1 |
| No | 0 (0.0) | 1 (8.3) | 1 (10. 0) | 1 (8.3) |
| Extrusion |  |  |  |  |  |  |
| Yes | 0 (0.0) | 3 (25.0) | 0.2208 | 0 (0.0) | 3 (25.0) | 0.2208 |
| No | 10 (100.0) | 9 (75.0) | 10 (100.0) | 9 (75.0) |
| Sequestration + Migration |  |  |  |  |  |  |
| Yes | 1 (10.0) | 2 (16.7) | 1 | 0 (0.0) | 0 (0.0) | 1 |
| No | 9 (90.0) | 10 (83.3) | 10 (100.0) | 12 (100.0) |

**Abbreviations:** Non-Phm, Non-pharmacological treatment; Phm, pharmacological treatment

**Supplementary Table 6.** Adverse events in clinical trial

| **Group** | **Subj. no** | **LLT** | **Causality** | **Severity** |
| --- | --- | --- | --- | --- |
| Phm | S1-14 | Gastritis | Possibly related | Mild |
| S1-24 | Nausea | Possibly related | Mild |
| Headaches | Possibly related | Mild |
| S1-13 | Cystitis | Definitely not related | Mild |
| S1-21 | Covid-19 | Definitely not related | Mild |
| Non-Phm | S1-03 | Nonspecific vaginitis | Definitely not related | Mild |
| S1-07 | Headaches | Definitely not related | Mild |
| S1-19 | Reflux esophagitis | Definitely not related | Mild |
| Headaches | Definitely not related | Mild |

**Abbreviations:** Covid-19, Coronavirus disease 2019; LLT, Lowest Level Term; Phm, Pharmacological treatment; Non-Phm, Non-pharmacological treatment; Subj.no, Subject Number

**Supplementary Table 7.** Healthcare costs and resource utilization after randomization

|  | Non-Phm (n = 15) | | Phm (n = 15) | |
| --- | --- | --- | --- | --- |
|  | Volume | cost ± SD | Volume | cost ± SD |
| **Intervention (30/30)** | 14.7 ± 3.9 | 1,018 ± 220 | 15.2 ± 1.3 | 770 ± 137 |
| Diagnosis | 15 (100) | 146 ± 37 | 15 (100) | 177 ± 15 |
| MRI | 15 (100) | 236 ± 0 | 15 (100) | 236 ± 0 |
| X-ray | 15 (100) | 8 ± 0 | 15 (100) | 8 ± 0 |
| Acupuncture | 15 (100) | 121 ± 32 | — | — |
| Chuna manual therapy | 15 (100) | 461 ± 146 | — | — |
| Electroacupuncture | 15 (100) | 46 ± 12 | — | — |
| Physical therapy | — | — | 15 (100) | 159 ± 20 |
| Prescription | — | — | 15 (100) | 45 ± 8 |
| Nerve block | — | — | 11 (73.3) | 198 ± 98 |
| **Transportation cost** | — | 46 ± 26 | — | 33 ± 5 |
| **Total time cost_ (14/15)** | 128.2 ± 43.7 | 537 ± 236 | 130.7 ± 45.6 | 606 ± 260 |
| Round trip (to and from the hospital) | 98.9 ± 44.2 | 419 ± 228 | 88.7 ± 36.0 | 413 ± 198 |
| Waiting time | 6.4 ± 2.3 | 26 ± 9 | 5.7 ± 1.8 | 26 ± 7 |
| Examination and treatment | 22.9 ± 7.5 | 92 ± 28 | 36.3 ± 13.6 | 167 ± 75 |
| **Additional private healthcare usage** | |  |  |  |
| **Outpatient visits** |  |  |  |  |
| B to 9th (14/15)1 | 6 (42.9) | 136 ± 227 | 2 (13.3) | 223 ± 196 |
| 9th to 27th (13/15)2 | 5 (38.5) | 579 ± 749 | 7 (46.7) | 298 ± 244 |
| Total (14/15) | 8 (57.1) | 463 ± 827 | 7 (46.7) | 362 ± 315 |
| **OTC (14/15)** | 2 (14.3) | 2 ± 0 | 0 (0.0) | NA |
| **ETC (14/15)** | 3 (21.4) | 158 ± 214 | 1 (6.7) | 32 ± NA |

**Abbreviations:** ETC, Et Cetera; MRI, Magnetic Resonance Imaging; OTC, Over the Counter; Phm, Pharmacological treatment; Non-Phm, Non-pharmacological treatment; SD, Standard Deviation;

1B to 9th: Baseline to 9th week. 2 9th to 27th: 9th week to 27th week

**Supplementary Table 8.** Outcomes with respect to additional healthcare utilization

|  | **Non-Phm** | **Phm** | **Difference** | **P-value** |
| --- | --- | --- | --- | --- |
| 1. Patients with additional healthcare utilization for the period of Week 14 to Week 27 | | | | |
| **ODI** |  |  |  |  |
| week 14 | 21.73 (11.86–31.60) | 38.97 (30.02–47.91) | 17.23 (3.39–31.08) * | 0.017 |
| week 27 | 21.51 (11.64–31.38) | 33.30 (24.36–42.24) | 11.79 (-2.06–25.64) | 0.091 |
| **NRS for leg** |  |  |  |  |
| week 14 | 1.13 (-0.31–2.58) | 5.39 (4.08–6.70) | 4.26 (2.26–6.26) *** | <0.001 |
| week 27 | 2.93 (1.49–4.38) | 3.72 (2.41–5.04) | 0.79 (-1.21–2.79) | 0.425 |
| 2. Patients without additional healthcare utilization for the period of Week 14 to Week 27 | | | | |
| **ODI** |  |  |  |  |
| week 14 | 23.60 (17.25–29.94) | 27.77 (21.76–33.78) | 4.17 (-4.62–12.97) | 0.344 |
| week 27 | 23.24 (16.89–29.58) | 23.53 (17.51–29.54) | 0.29 (-8.51–9.09) | 0.948 |
| **NRS for leg** |  |  |  |  |
| week 14 | 3.76 (2.79–4.72) | 3.77 (2.84–4.70) | 0.01 (-1.33–1.35) | 0.989 |
| week 27 | 3.51 (2.54–4.47) | 2.10 (1.17–3.03) | -1.41 (-2.75–-0.06) * | 0.040 |

**Abbreviations:** Non-Phm, Non-pharmacological treatment; NRS, Numeric Rating Scale; ODI, Oswestry Disability Index; Phm, Pharmacological treatment

* *p*-value<0.05, *** *p*-value<0.001

1. Hawker, G.A., et al., *Measures of adult pain: Visual analog scale for pain (vas pain), numeric rating scale for pain (nrs pain), mcgill pain questionnaire (mpq), short‐form mcgill pain questionnaire (sf‐mpq), chronic pain grade scale (cpgs), short form‐36 bodily pain scale (sf‐36 bps), and measure of intermittent and constant osteoarthritis pain (icoap).* Arthritis care & research, 2011. **63**(S11): p. S240-S252.

2. Karcioglu, O., et al., *A systematic review of the pain scales in adults: which to use?* The American journal of emergency medicine, 2018. **36**(4): p. 707-714.

3. Jeon, C.-H., et al., *Cross-cultural adaptation of the Korean version of the Oswestry Disability Index (ODI).* Journal of Korean Society of Spine Surgery, 2005. **12**(2): p. 146-152.

4. Kim, D.-Y., et al., *Validation of the Korean version of the oswestry disability index.* Spine, 2005. **30**(5): p. E123-E127.

5. Cha, Y.-J. and K. Kim, *Reliability and validity of the Korean version of the fear of daily activities questionnaire for patients with low back pain.* The Journal of the Korea Contents Association, 2011. **11**(5): p. 224-232.

6. Dworkin, R.H., et al., *Core outcome measures for chronic pain clinical trials: IMMPACT recommendations.* Pain, 2005. **113**(1-2): p. 9-19.

7. Dworkin, R.H., et al., *Interpreting the clinical importance of treatment outcomes in chronic pain clinical trials: IMMPACT recommendations.* The journal of pain, 2008. **9**(2): p. 105-121.

8. Kim, S.-H., et al., *Assessment of psychometric properties of the Korean SF-12 v2 in the general population.* BMC Public Health, 2014. **14**(1): p. 1-7.

9. Kim, S.-H., et al., *The EQ-5D-5L valuation study in Korea.* Quality of Life Research, 2016. **25**(7): p. 1845-1852.

10. Kim, T.H., et al., *Psychometric properties of the EQ-5D-5L in the general population of South Korea.* Quality of Life Research, 2013. **22**: p. 2245-2253.
